# Supplementary material for: Efficacy and safety of T-DM1 in the ‘common-practice’ of HER2+ advanced breast cancer setting: a multicenter study
Source: PubMed Central journal article supplement (PMC5610019; doi:10.18632/oncotarget.16373), 2017-03-18
Supplement: oncotarget-08-64481-s001.pdf [file oncotarget-08-64481-s001.pdf]

## Efficacy and safety of T-DM1 in the 'common-practice' of HER2+ advanced breast cancer setting: a multicenter study

### Supplementary Material

Table S1: Response to T-DM1 according to metastatic site

| Activity | N (%)         |               |               |              |                |
|----------|---------------|---------------|---------------|--------------|----------------|
|          | BONE<br>(108) | NODES<br>(96) | LIVER<br>(99) | LUNG<br>(89) | BRAIN*<br>(59) |
| CR       | 2 (1.8)       | 5 (5.2)       | 6 (6.0)       | 2 (2.2)      | 2 (3.3)        |
| PR       | 25 (23.1)     | 31 (32.2)     | 38 (38.3)     | 26 (29.2)    | 15 (25.4)      |
| SD       | 49 (45.3)     | 33 (34.3)     | 26 (26.2)     | 25 (28.0)    | 11 (18.6)      |
| PD       | 32 (29.6)     | 27 (28.1)     | 29 (29.2)     | 36 (40.4)    | 31 (52.5)      |
| ORR      | 27 (25.0)     | 36 (37.5)     | 44 (44.4)     | 28 (31.5)    | 17 (28.8)      |

CR=complete response; PR=partial response; SD=stable disease; PD=progressive disease; ORR=overall response rate

\*Evaluable patients for response were 59/87
